# Supplementary material for: Tipping of the double-diffusive regime in the Southern Adriatic pit in 2017 in connection with record high salinity values
Source: Copernicus journal article supplement (doi:10.5194/egusphere-2023-2481), 2023-10-27
Supplement: Supplementary file [file egusphere-2023-2481-AC1-supplement.pdf]

Reply to Referee #2

Title: Tipping of the double-diffusive regime in the Southern Adriatic pit in 2017 in connection with record high salinity values

Author(s): Felipe L. L. Amorim, Julien Le Meur, Achim Wirth and Vanessa Cardin

MS No.: egusphere-2023-2481

MS type: Research article

Iteration: Initial submission

Special issue: Extremes in the marine environment: analysis of multi-temporal and multi-scale dynamics using observations, models, and machine learning techniques

**Major comments:**

**The manuscript presents an original 5-year-long time series from the southern Adriatic that characterizes the evolution of the thermohaline content from the surface down to 1200 m. Despite the relative coarse vertical resolution of the measurements, the large scale variations of the salinity and temperature contents capture the winter deepening of the mixed layer, which depends on the intensity of surface heat losses and the salinity stratification. The analysis focuses on the potential role of the salt fingering regime on the evolution of the stratification of the region.**

**The pieces of information provided by this study are new, interesting for the region and complement previous studies. Therefore I would recommend the study to be published after some revisions.**

We thank the Anonymous Referee #2 for the effort in reviewing the manuscript and for her/his positive evaluation. The posted comments and suggestions helped us to improve the manuscript.

**My main comment is that, it's not because the stratification is prone to salt-fingering dynamics that salt fingers will indeed develop. Many times in the text, the opposite is mentioned, that is, authors observe a favorable regime for salt fingering, thus they conclude that there is mixing associated with that process. More care should be given in the use of the Turner angle.**

The reviewer is right. Salt fingering (SF) Turner angle does not mean that there is necessarily SF happening (see also our answer to ref.3), it is a predisposition to SF. In scientific papers SF regime and SF Turner angle is often interchanged. Our mooring observation is spatially too coarse to directly observe SF stair cases. The assumption that there is a mixing process associated with salt fingers is based, as already mentioned, on the favorable Turner angle range (salt finger regime); salinity and temperature decreasing with depth; staircases in two vertical profiles of an Argo float and the high vertical diffusivity coefficient already studied by Cardin et al 2021, that could not be

explained at the time the article was published. We now added “a predisposition to SF” or “favorable to” in the manuscript at several locations:

**At other places, the term “mixing” is used (good examples can be found in the start of the discussion). “Mixing” is a generic term that covers many processes. The process(es) should be mentioned whenever the term mixing is used so that the reader knows what it is all about (winter convection/deepening of the mixed layer, salt-fingering, ...).**

We agree and we updated the manuscript.

Line 7: “In double-diffusive mixing...”

Line 192: “...a convective mixing...”

Line 233: “...double-diffusion vertical mixing...”

Line 247: “...convective (winter convection) mixing.”

Line 269: “...the favorable associated vertical mixing is weaker.” Referring to SF.

Line 304: “...double-diffusive favorable mixing”

Line 306: “double-diffusion vertical mixing”

**In the same vein, there are few descriptions of the figures done in the text that lack of precision and/or do not seem correct. Some examples are given in the detailed comments below.**

#### **Detailed comments:**

**l. 54: in the Med Sea there are several estimates of the diffusivities associated with “double-diffusion” that could be referenced on purpose (e.g. Bryden, Harry L. et al. “Thermohaline staircases in the western Mediterranean Sea.” *Journal of Marine Research* 72 (2014): 1-18)**

Thank you for the reference, it was added in the text.

Line 58: (Bryden et al. 2014; ...)

#### **l. 120: How were the geostrophic velocities estimated at 1150 dbar ?**

There was a misunderstanding due to the form in which it was presented in the text. We meant that the surface relative vorticity (RV) was calculated in an area bounded by the 1150 isobath. The geostrophic velocities used to derive the RV are only on the surface and available from Copernicus Marine Service data.

Line 125: Surface relative vorticity were defined following Eq. (3):

$$(RV = \frac{\partial v}{\partial x} - \frac{\partial u}{\partial y}),$$

where u and v are surface geostrophic velocities (SEALEVEL\_EUR\_PHY\_L4\_MY\_008\_068 product; Copernicus Marine Service) in an area bounded by the isobath of 1150 dbar. The RV is the average of 18 grid points around the mooring position with 0.125° spatial resolution.

**I. 146: I guess there is a connection between “the intrusion of high salinity into intermediate layers” and “the strong convection event”, but the two are presented as independent observations.... Thus, I’m not sure that I have correctly understood if one is the consequence of the other, or if I do not focus on the right observations on Fig. 2...**

The presence of higher salinity at surface followed by a strong convection event is seen as a combined process causing the extreme vertical change in salinity (see observation in the right at Fig 2). It should be noted that the two processes are not independent of each other, as the strong salinity signal at the surface interacts with the observed strong deep convection event. The results of the higher salinity at surface and the deep convection event are shown in Figure 3. We added:

Line 155: “...contributing to...”

**I. 148: More care has to be given while referring to figures. As far as I can see on Fig. 3a, the heat loss do not exceed about 600 W m-2 (and not 700) in January and 100 or 200 W m-2 in March (and not 500). In Tab. 1, the max. heat loss of winter 2016-2017 is 623 W m-2.**

We agreed with the reviewer and the sentence was altered.

Line 156: Indeed, strong heat losses occurred in January ( $\approx 600$  W/m<sup>2</sup>; Table 1) (Fig. 3a), which, together with the contribution of salt in the water column, facilitated the erosion of the stratification (Fig. 3b, Table 1).

**I. 178: Are you referring to isohalines (38.76 to 38.80) on Fig. 3b and Fig.2ab (38.78) ?**

Yes, we included the figure reference in the text.

Line 180: (Fig. 3b)

**l. 181-182: “There is no convection during winter 2019...” ??? If winter 2019 is winter 2018-2019, given Fig 2ab and Fig. 3ab , I would disagree. The deepening of the mixed layer reaches 400-500 m. It is not as strong as the previous two winters but it is not very far behind.**

The reviewer is right, convection took place even though not as strong as during the previous winters. The text was modified and rephrased in the manuscript:

Line 192: As a result, the amount of salt present in the water column triggered a convective mixing similar to that observed in the winter of 2017/18.

**l. 195-196: “...and the departure of the less saline... above the LIW (second).” This departure is not really visible on Fig. 3. I was wondering if referring to Fig. 2b would be better ? On Fig. 2b, we easily identify the salinity maximum associated with the LIW and the salinity minimum above in 2015 and 2016. After Winter 2016-2017, there is no more clear salinity maximum (LIW) and minimum (above).**

Agreed. We added the reference to Fig. 2.

Line 205: ...with the high salinity below the surface (150 to 350 dbar) pushing the intrusion of the LIW core downward and the departure of the less saline water layers above the LIW (second) (Fig 2).

**l. 197: At a scale of a gyre or a meso-scale, cyclonic conditions can favor MLD deepening. Here there is a cyclonic vorticity observed. I was wondering what was the horizontal extent of the cyclonic circulation ? (and this also relates to my previous question on how was determined the vorticity, from which geostrophic current estimates ? On what scales ? Fig. A3 does not really helps in that matter).**

The horizontal scale of the cyclonic relative vorticity in the South Adriatic pit is about 100 km. The surface relative vorticity is the average of 18 grid points falling inside an area limited by the isobaths of 1150 dbar and derived from surface geostrophic velocities (daily and spatial resolution of 0.125°).

**l. 199: that “cyclonic preconditioning of the stratification + strong heat loss” favors a low  $N^2$  due to deeper than usual convection, I agree. But I’m not sure that the same sequence implies “observed salt fingering”. So far this is not observed and not described and this comment is confusing at this point of the manuscript. Later in section 3.3, you observe conditions that are somehow favorable to a salt fingering regime, though over most of the water column, the Turner angle is not strongly favourable (close to 90°). It remains weakly or moderately favorable, except in the 700-900 m layer where it is strongly favorable during year 2018-2019.**

We changed the sentence to:

Line 209: These three factors contributed to the observed low  $N^2$  (Fig 4) and the SF favorable scenario.

**I. 224: “... the uppermost layer returns to strong SF”: I guess this comment refers to the very short time peak in January (-February ?) 2017 that brings the turner angle close to  $90^\circ$  (since later on the turner angle is “only” weakly SF favorable). On the other hand, the vector length is very weak apart from a peak at the very beginning of January (from what I can guess looking at Fig. 5 and 6). If the vector length is weak, does the SF favorable peak in Turner angle matters ?**

Yes, we refer to the peak in January 2017. The peaks in Turner angle (Tu) and vector length (VL) match at this time. We observed after these peaks, when convection initiates, the sharp drop in TA, going to unstable regime, and reaching null values in VL. We rephrased the sentence.

Line 232: The stable stratification leads to low values of double-diffusion vertical mixing in the upper layer (350|550), and the underlying layers evolve more independently. Due to an increase in salinity at 350 dbar in early 2017, the uppermost layer showed peaks of strong SF and high VL. Subsequently, convection occurred causing the sharp decrease of VL and occurrence of unstable regime described by the Turner angle.

**I. 226: “... leading to SF”: How can you be sure that salt fingering is really actively occurring ? The sole observation of the Turner angle is insufficient.**

As argued, we assume the vertical mixing by double-diffusion due to salinity and temperature gradients and the staircase features in the Argo floats profiles. Following the Reviewer suggestion, we modified the text.

Line 236: “...leading to favorable SF regime...”.

**I. 241: the paragraph starts with the two deepest layers? Then, second line we move to the top 3 layers (350-00). Third line, a prominent peak in Tu is mentioned, but is it that of layer 1 (350-550) occurring early 2017, or that of the lowest layer (1000-1200) in spring ? I’m a bit lost here.**

Thank you for pointing this out. We refer to the first layer (350|550 dbar). We complemented the sentence.

Line 252: Analysis of VL shows an eradication of stratification in early 2017 from 350 dbar down to 900 dbar which persists until the end of the data record. The prominent peaks in Tu and VL in the first layer (350|550 dbar) in early 2017 are due to the arrival of warm, salty water at 350 dbar that possibly triggered strong SF (see also Fig. 7 and the discussion of the Argo data below).

**I. 248: “... and a decrease in the two lowest layers”: it is not clear for the deepest one. There is a increase in spring followed by some oscillations. I’m not sure about any decrease if I compare with years 2015-2016.**

We agreed and we rephrased the sentence.

Line 260: The regime change in 2017 is indicated by an increase in Tu in the 750|900 dbar layer and a decrease in the 900|1000 dbar layer. In these two layers, the peaks of the pdfs are well separated, indicating a regime change. In the deepest layer (1000|1200 dbar), it is observed an oscillatory pattern from 2017, moving from SF to doubly stable regime, spreading the PDF in the second period but keeping the peaks close.

**I. 249: wording... “The Tu shows significant destabilization....”: What is significant ? What is “destabilization” ? Destabilization would mean instability. Again the Turner angle is not a proof that salt fingering is active. You could re-word in terms of “more or less favorable SF regime”..**

Line 263: We rephrased to “The Tu shows notable tendency in SF in the 750|900 dbar layer after 2017 and a tendency to stabilization of the layer below, due to the convection event in 2017”.

**I. 278: “we observe an increase of SF development”.... ??? Is there a figure showing that staircases increased ? You observe an increase of favorable conditions of the SF regime. You do not really observe the mixing associated with SF except for the example of staircases given with the Argo float, with the assumption that SF is at the origin of steps and layers.**

Line 296: “...we observed an increased predisposition of SF occurrence in the SAP due to the increase in salinity, and this could enhance salt-finger double diffusion in the subsurface layer of 350|550 dbar.”

**I. 286: “reduced the mixing...” : Do you refer to winter convective mixing or salt fingering mixing here?**

We refer to double-diffusive mixing here. We added it to the text.

Line 304: From 2014 to the end of 2016 strong stratification above 400 dbar and at 800 dbar reduced the double-diffusive favorable mixing between the upper ocean and the deep SAP.

**l. 287: “... further reducing the vertical mixing”: this would be right if SF favorable mixing conditions (as diagnosed with Tu angle) => active mixing. This is not the case. You can just say that it reduces the possibility of having active salt fingering.**

Line 304: After the winter of 2014/15, the upper layer passes from SF to doubly stably stratified, further reducing the possibility of having active salt fingering and consequently double-diffusion vertical mixing.

**l. 292 – 298: a schematic showing the different contributors acting on the stratification in the SAP would be nice to summarize these ideas. To avoid adding a supplementary Figure, I would suggest to replace Fig. 7 c-d-g-h-k-l by this schematics. Fig. 7 c-d-g-h-k-l (Turner angles) could be grouped with Fig. 7 a-b-e-f-i-j using a color scaling that depend on the Tu angle, or different markers depending on the Tu regimes.**

Thank you for the suggestion, we have discussed the point extensively and tried to come up with a scheme. However, the behavior differs every year (in winter), so we would need 5 different schemes. We would therefore very much prefer to keep the figures with the data and the histograms, which are essential to illustrate our point of tipping of the double diffusive regime as stated in the title. The text will then describe the processes acting at different times (years).

**l. 301: the vector length is a novelty, ok, but it is not that much used in this manuscript.**

VL is mentioned 22 times in the paper. It is important as it emphasizes the importance of Tu as discussed in the “Data and Methods” section. It is mentioned several times that stratification is low when VL is weak, in these cases the Tu value is not significant. Analyzing Tu without considering VL is telling only part of the story.

**Minor comments:**

**- e.g. l. 51, 54, ... end elsewhere: Some care to the formatting of units and numbers is needed (...x10<sup>-4</sup> m<sup>2</sup>/s => ... × 10<sup>-4</sup> m<sup>2</sup> s<sup>-1</sup>)(another example among others, caption of Fig. 3 “W\*m-2”...)**

Thank you, we fixed the units along the text.

**l. 67: Could you add the seafloor depth at the mooring position ?**

The depth at the mooring position is around 1200 dbar, it was added to the text.

**Fig. 3A, what are the red parts of the blue line ? This should be described in the caption.**

Net heat flux. It was added to the caption.

**l. 258: Fig. 7K instead of 8K ?**

Yes, the reviewer is correct.

**l. 289: suggestion “... due to the arrival of high saline surface waters that favored a convective...” (since its a part of the story, preconditioning by salinity, the other part being the enhanced heat loss compared with the two previous winters).**

Thank you, we followed the suggestion.

**l. 409: Radko (not Ratko)**

Thank you, we changed in the reference part.

**Figs A5-A8: what is the meaning of the color of the points ? (the only color-scale is depth)**

The color of the points is the maximum MLD depth (blue to red colorbar) and the bathymetry is the background (white-black colorbar). Following suggestion from Referee #1, the images will be added to Supplementary material.
